# Supplementary material
Source: PubMed Central journal article supplement (PMC9349454)
Supplement: ADFM-32-0-s001.pdf [file ADFM-32-0-s001.pdf]

# ADVANCED FUNCTIONAL MATERIALS

## Supporting Information

for *Adv. Funct. Mater.*, DOI: 10.1002/adfm.202204462

Lipid-Polymer Hybrid “Particle-in-Particle” Nanostructure  
Gene Delivery Platform Explored for Lyophilizable DNA  
and mRNA COVID-19 Vaccines

*Zhongyu Li, Xue-Qing Zhang,\* William Ho, Xin Bai,  
Dabhu Kumar Jaijyan, Fengqiao Li, Ranjeet Kumar,  
Afsal Kolloli, Selvakumar Subbian, Hua Zhu, and  
Xiaoyang Xu\**

## Supporting Information

**Lipid-polymer hybrid “Particle-in-Particle” nanostructure gene delivery platform explored for lyophilizable DNA and mRNA COVID-19 vaccines**

*Zhongyu Li, Xue-Qing Zhang\*, William Ho, Xin Bai, Dabbu Kumar Jaijyan, Fengqiao Li, Ranjeet Kumar, Afsal Kolloli, Selvakumar Subbian, Hua Zhu, and Xiaoyang Xu\**

Z. Li, W. Ho, F. Li, X. Xu

Department of Chemical and Materials Engineering

New Jersey Institute of Technology

Newark, NJ 07102, USA

Email: [xiaoyang.xu@njit.edu](mailto:xiaoyang.xu@njit.edu)

X. Zhang, X. Bai

Engineering Research Center of Cell & Therapeutic Antibody Ministry of Education, School of Pharmacy

Shanghai Jiao Tong University

Shanghai 200240, P. R. China

E-mail: [xueqingzhang@sjtu.edu.cn](mailto:xueqingzhang@sjtu.edu.cn)

D. Jaijyan, H. Zhu

Department of Microbiology, Biochemistry and Molecular Genetics

Rutgers—New Jersey Medical School

Newark, NJ 07103, USA

R. Kumar, A. Kolloli, S. Subbian,

Public Health Research Institute (PHRI)

Rutgers—New Jersey Medical School

Newark, NJ 07103, USA

X. Xu

Department of Biomedical Engineering

New Jersey Institute of Technology  
Newark, NJ 07102, USA

|                 | <b>Mw<br/>(Dalton)</b> | <b>Mn<br/>(Dalton)</b> | <b>PDI<br/>(Mw/Mn)</b> |
|-----------------|------------------------|------------------------|------------------------|
| PBAE-447        | 4173                   | 2562                   | 1.746                  |
| C12-PBAE (1:10) | 5435                   | 2892                   | 1.879                  |
| C12-PBAE (1:5)  | 6241                   | 3506                   | 1.781                  |
| C12-PBAE (1:2)  | 8653                   | 3626                   | 2.386                  |

**Figure S1. Gel permeation chromatography (GPC) of C12-PBAE.** The GPC results showed the molecular weight (MW) of C12-PBAE increased from 4173 Da to 5435, 6241, and 8653 Da with different molar ratios of C12-lipid to PBAE (from 1:10, 1:5 and 1:2) in the reactions, respectively. After calculating  $\Delta MW / (MW \text{ of C12 lipid})$ , there are an estimated six, twelve and twenty C12-lipids conjugated on the PBAE backbone, respectively.

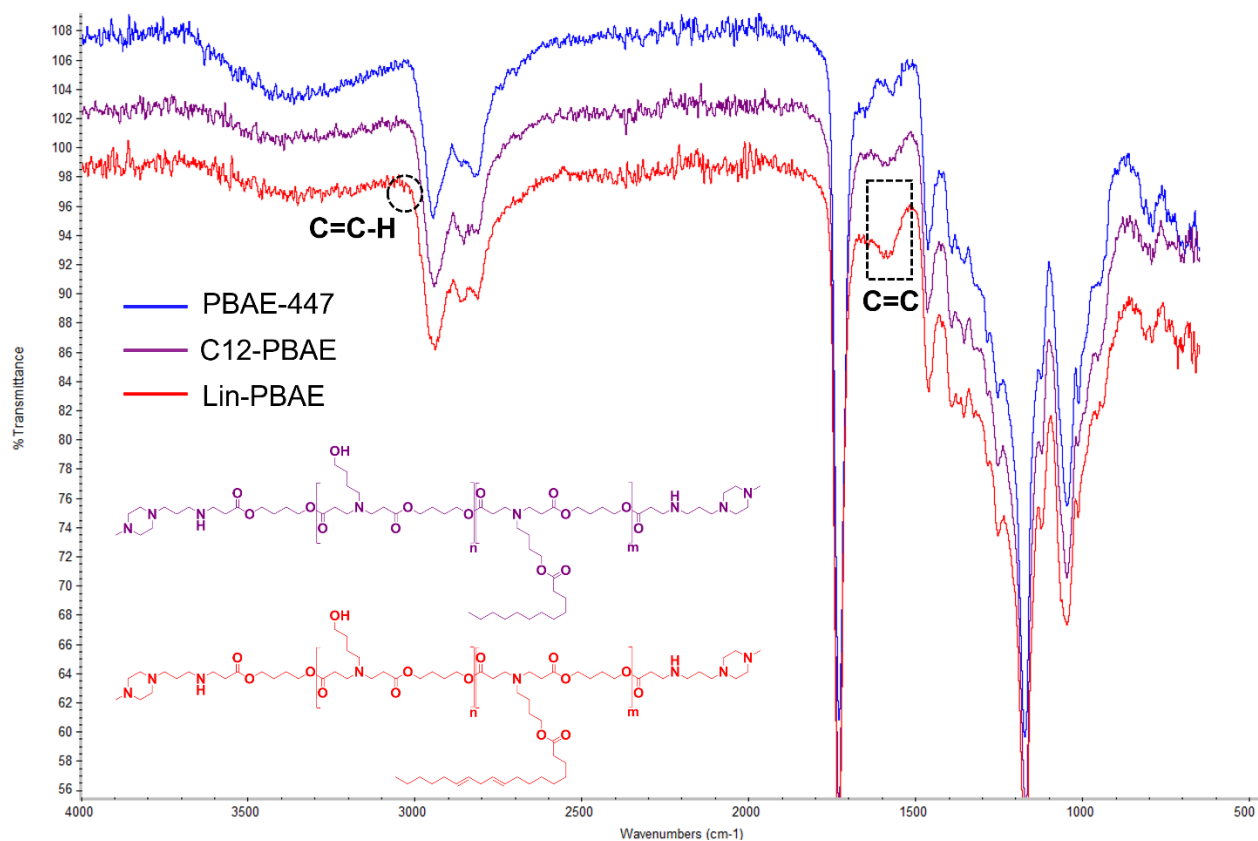

**Figure S2. Fourier-transform infrared spectroscopy (FTIR) of L-PBAEs.** The FTIR spectrum revealed the carbon-carbon double bond characteristic peaks of linoleic lipids conjugated on PBAE backbones. (C=C-H at ~3000 cm<sup>-1</sup> and C=C at ~1600 cm<sup>-1</sup>)

A

## PBAE-447

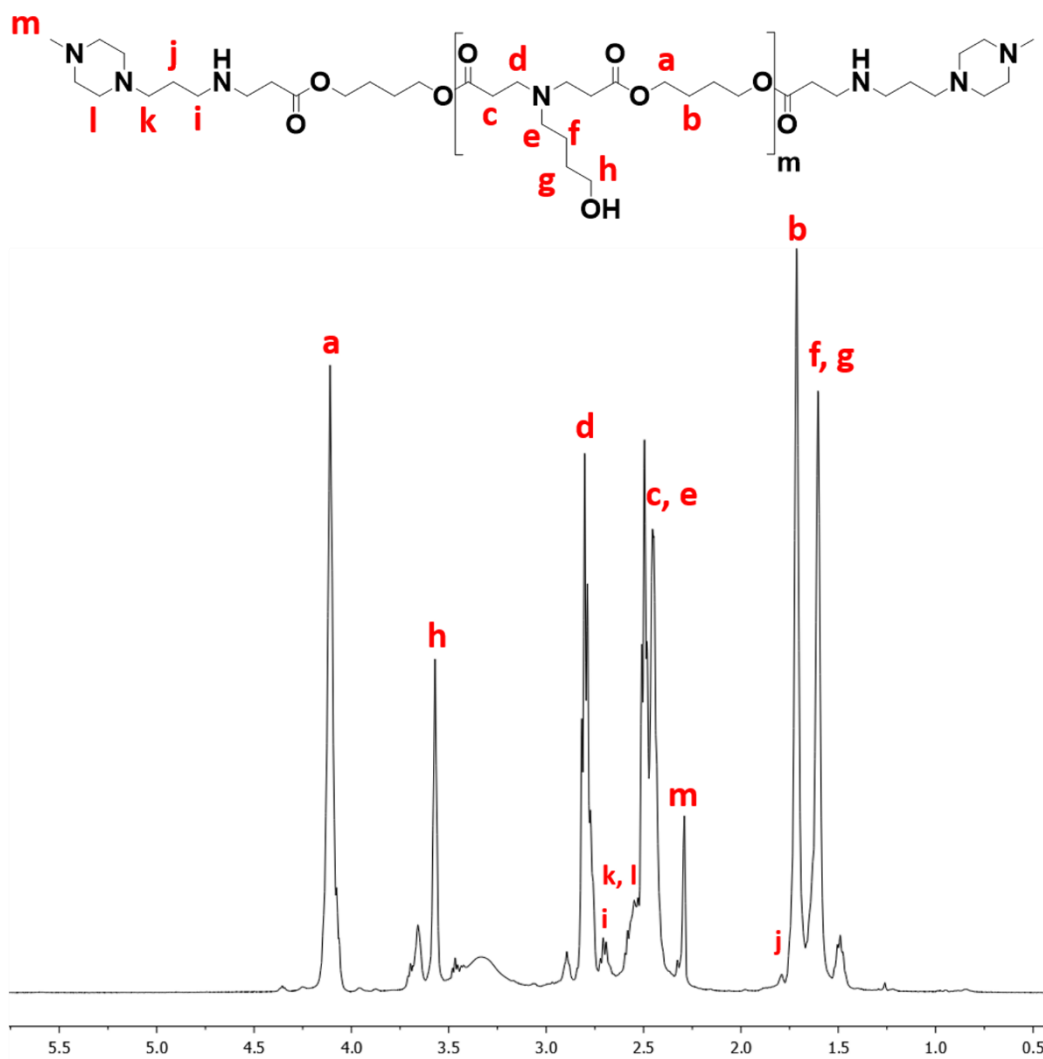

B

## C12-PBAE

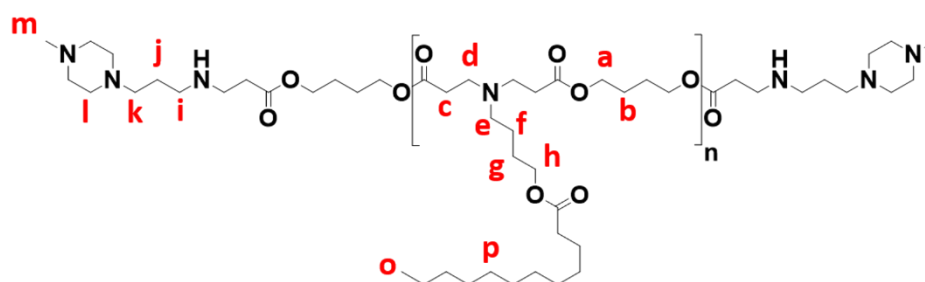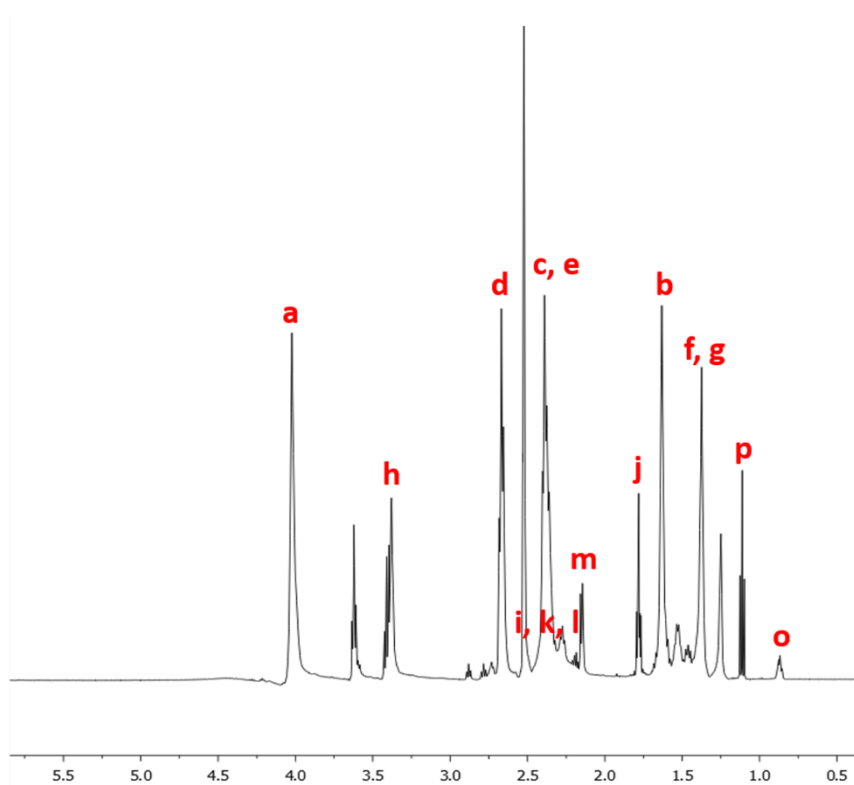

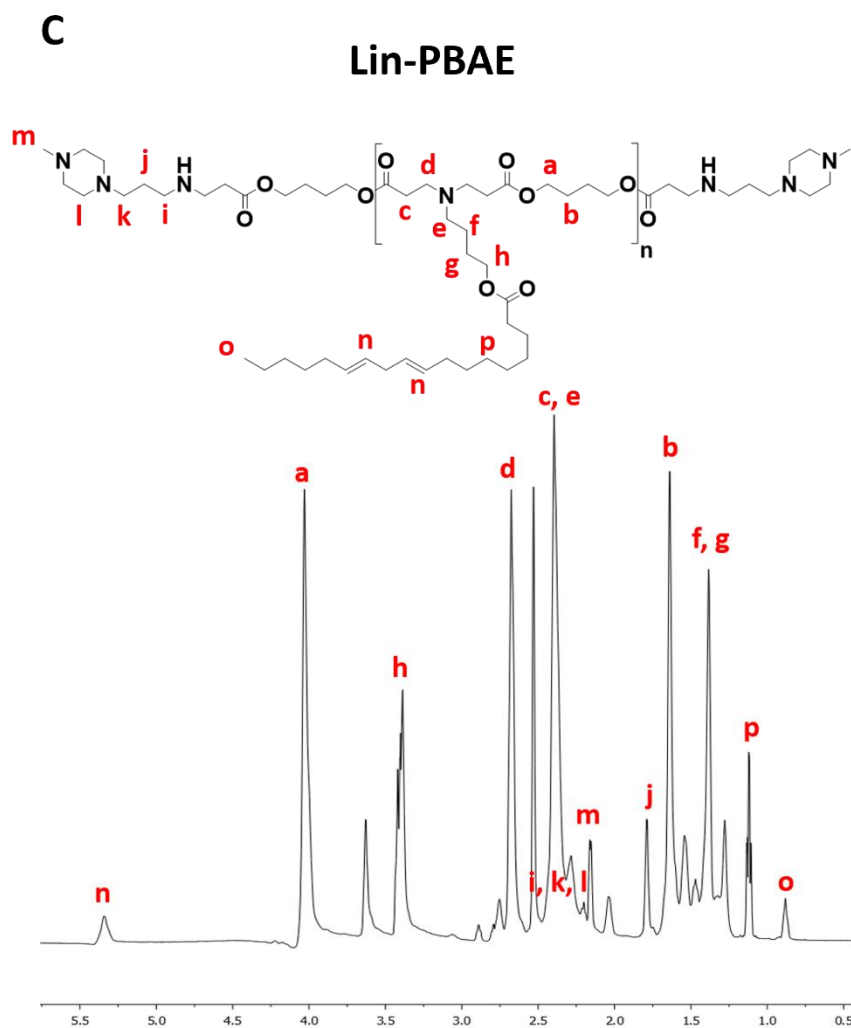

**Figure S3. Nuclear Magnetic Resonance (NMR) spectroscopy of L-PBAEs.** The conjugation of the C12-lipid and Linoleic-lipid on PBAE backbone were proved by NMR spectrum. The C12-lipid peaks of C12-PBAE were detected by NMR and briefly labeled ‘o’ and ‘p’ (**Figure S3B**) compared with the absence of these peaks in the original PBAE spectrum shown in **Figure S3A**. Similarly, the linoleic-lipid peaks of Lin-PBAE were also detected by NMR and labeled ‘o’, ‘p’ and ‘n’ (**Figure S3C**) which included carbon-carbon double bond characteristic peaks compared with C12-PBAE, which does not have an ‘n’ peak (**Figure S3B**).



| Formulation           | Size, nm | Polydispersity | Zeta potential, mV |
|-----------------------|----------|----------------|--------------------|
| PNP/C8-PBAE (1:10)    | 159.3    | 0.168          | +26.3              |
| PNP/C10-PBAE (1:10)   | 157.6    | 0.128          | +28.8              |
| PNP/C12-PBAE (1:10)   | 154.3    | 0.150          | +26.8              |
| PNP/C14-PBAE (1:10)   | 156.5    | 0.141          | +27.1              |
| PNP/C16-PBAE (1:10)   | 167.7    | 0.135          | +26.5              |
| PNP/C18-PBAE (1:10)   | 170.2    | 0.140          | +25.1              |
| PNP/Oleic-PBAE (1:10) | 163.7    | 0.162          | +22.3              |
| PNP/Lin-PBAE (1:10)   | 161.6    | 0.154          | +24.6              |
| PNP/C12-PBAE (1:5)    | 178.5    | 0.175          | +22.6              |
| PNP/C12-PBAE (1:2)    | 209.2    | 0.171          | +21.2              |
| PNP/PBAE              | 175.5    | 0.158          | +17.2              |

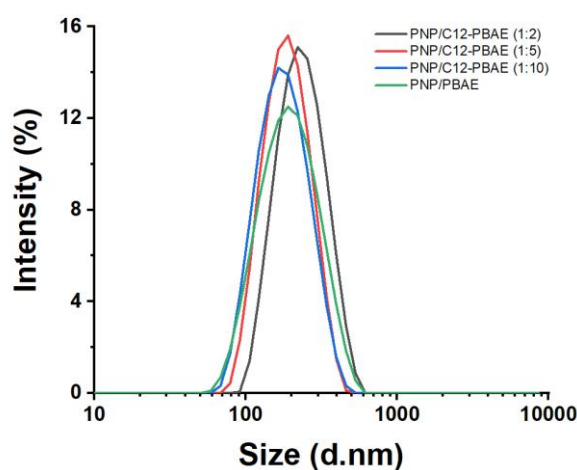

**Figure S4. Characterization of different lipid molar ratios of PNP/L-PBAE NPs.** Size distribution and zeta potential of PNP/L-PBAE NPs library were characterized. As the lipid molar ratios (of PBAE backbone) increased from 1:10 to 1:2, the NP size increased from 150 to 210 nm with narrow distribution of PDI of around 0.15.

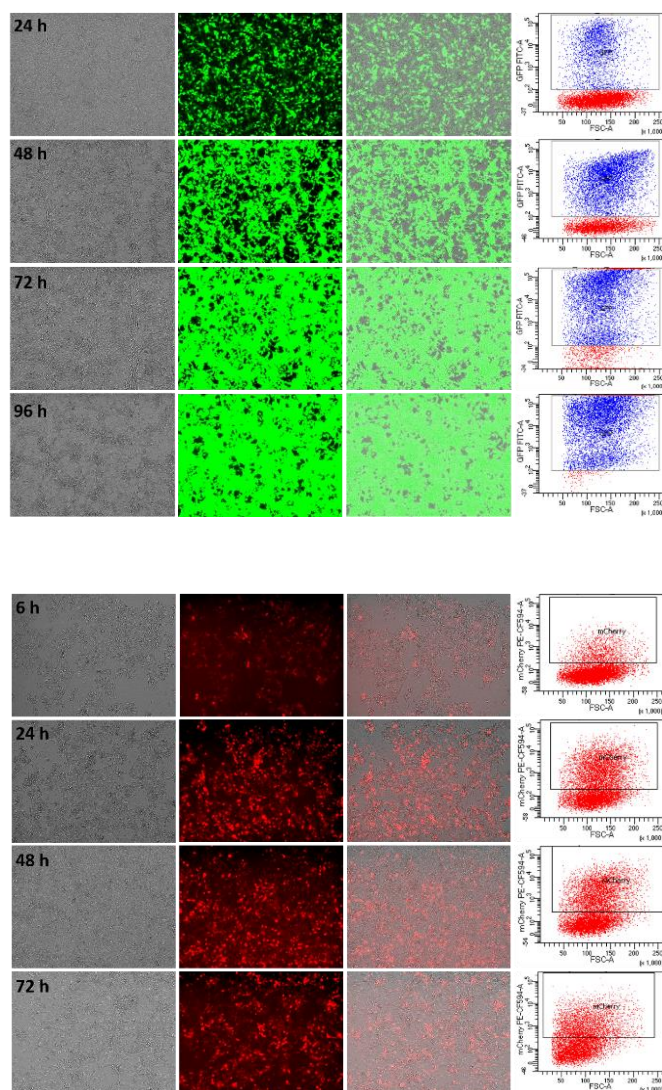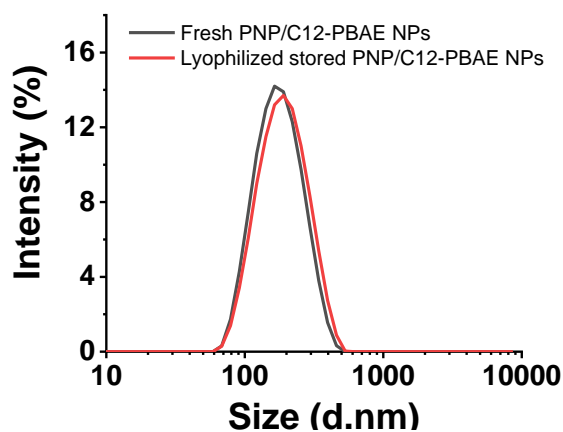

**Figure S5. Characterization of long-term stored lyophilized PNP/C12-PBAE NPs.** The lyophilized PNPs have been stored for 12 months at  $-20\text{ }^{\circ}\text{C}$  and still maintained transfection efficacy for both plasmid (green) and mRNA (red) comparing to fresh PNPs. The comparison of size distribution of fresh and 12 months stored lyophilized PNP NPs.

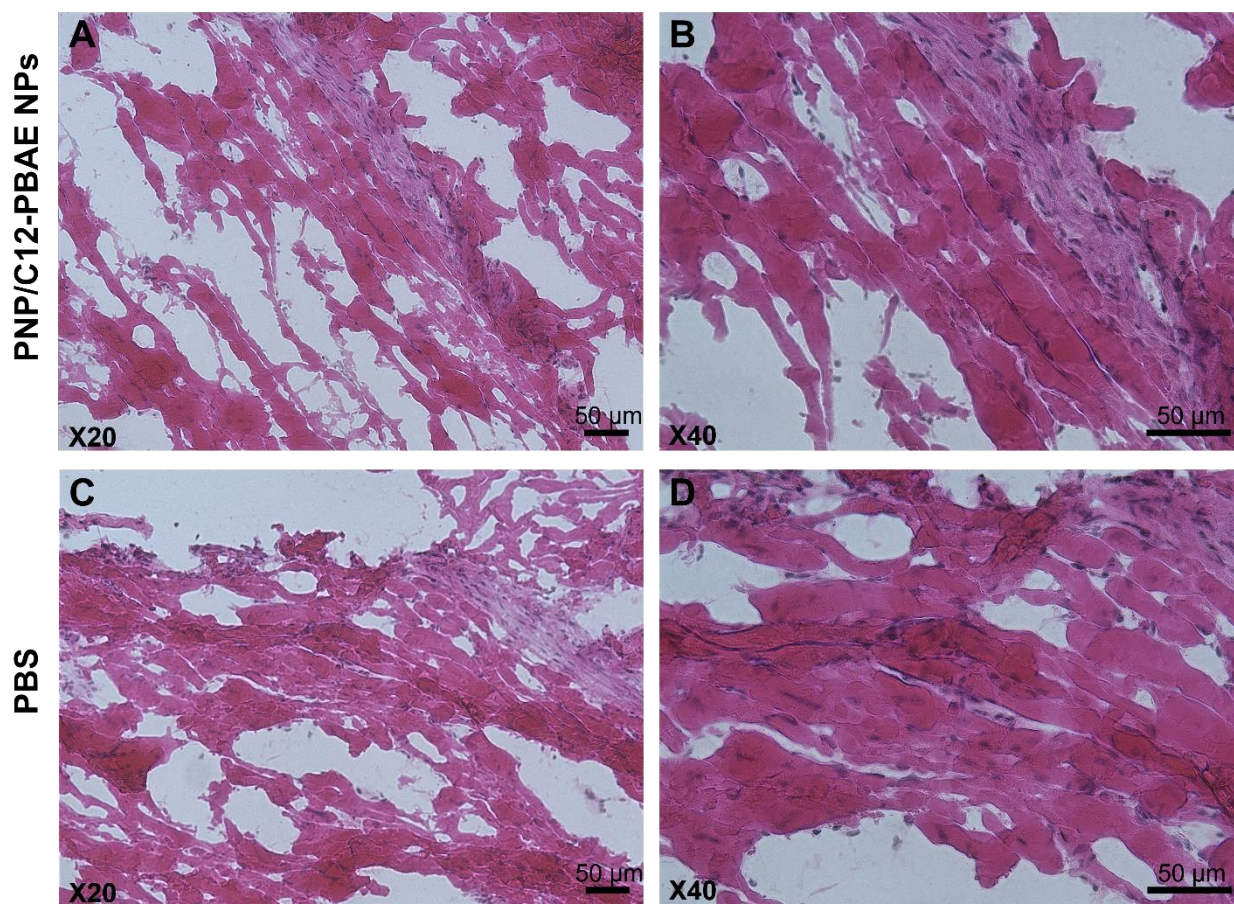

**Figure S6. Histopathological analysis of muscle tissues surrounding nanoparticle injection site.** (A) Muscle sections from mice in the PNP/C12-PBAE NP group were stained with haematoxylin and eosin (H&E), and representative photomicrographs were taken at 20x and (B) 40x magnification. (C) Muscle sections from the PBS group were stained with H&E and representative photomicrographs were taken at 20x and (D) 40x magnification (scale bars, 50  $\mu\text{m}$ ).

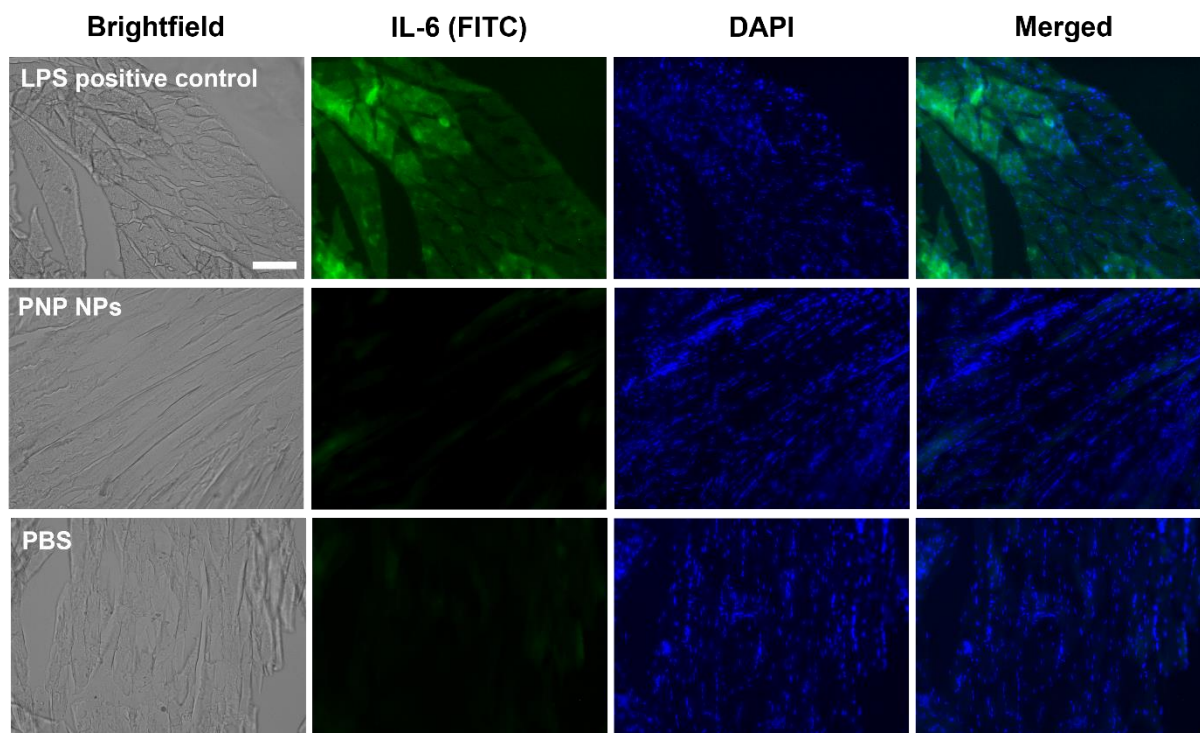

**Figure S7. Immunofluorescence assay of IL-6 proinflammatory biomarker of muscle tissues surrounding nanoparticle injection site.** Muscle sections from lipopolysaccharide LPS (1  $\mu\text{g}/\mu\text{L}$ , 100  $\mu\text{L}$ , top), PNP NPs (50  $\mu\text{L}$ , middle) and PBS (50  $\mu\text{L}$ , bottom) injected mice were detected by IL-6 antibodies, and representative photomicrographs were taken at 20x magnification under brightfield, FITC, DAPI and merged channels (scale bars, 50  $\mu\text{m}$ ).

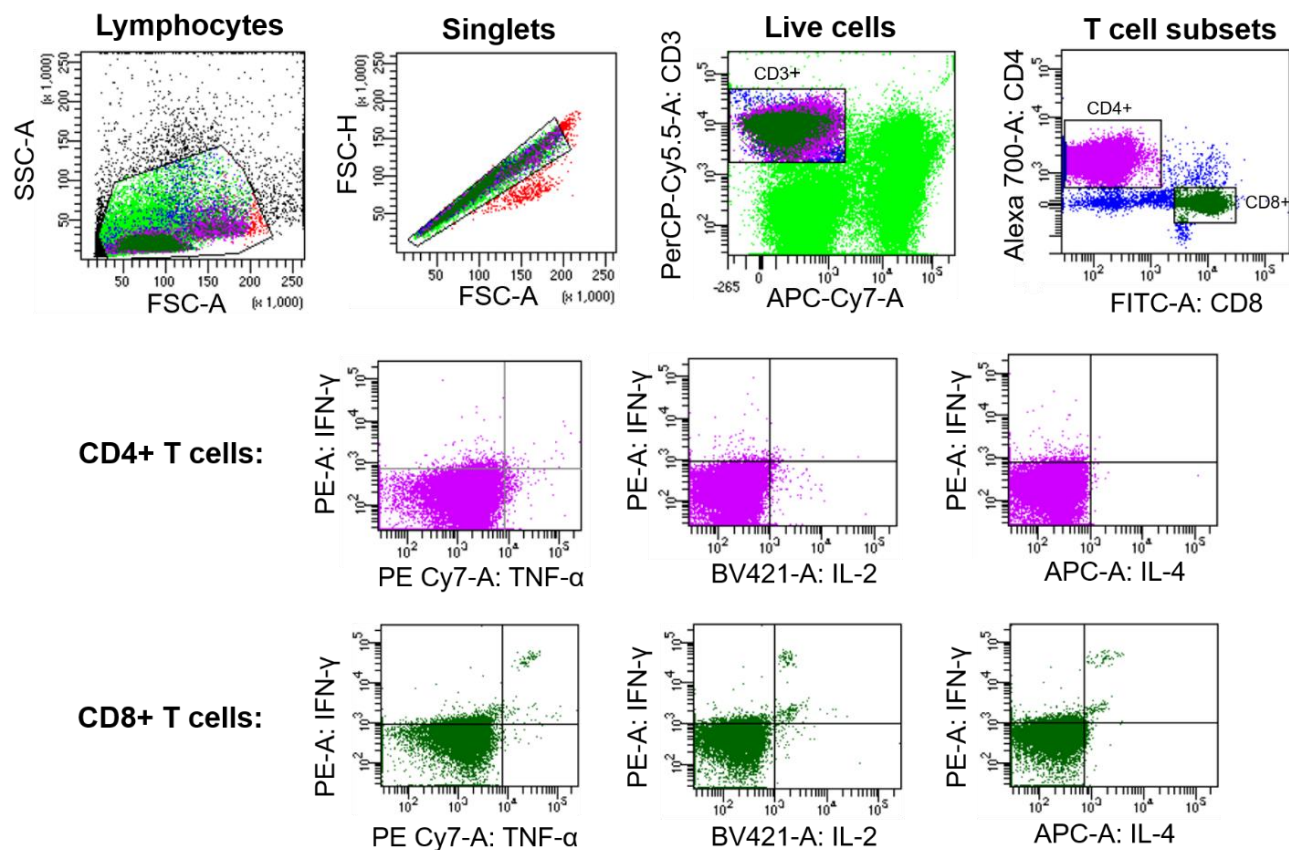

**Figure S8. Flow cytometry gating strategy of intracellular cytokine staining.** SARS-CoV-2 spike peptide pool stimulated T cells were stained and analyzed by flow cytometry. The T cell samples were gated to identify lymphocytes, singlets, live CD3<sup>+</sup> T cells and T cell subsets of CD4<sup>+</sup> and CD8<sup>+</sup> T cells on the top row. For CD4<sup>+</sup> and CD8<sup>+</sup> T cells, the gates of IFN- $\gamma$ , TNF- $\alpha$ , IL-2 and IL-4 were established (middle and bottom rows).

MFVFLVLLPLVSSQC VNLTTRTQLPPAYTNSFTRGVYYPDKVFRSSVLHSTQDLFLPF  
 FSNVTWFHAIHVSGTNGTKRFDNPVLPFNDGVYFASTEKSNIIRGWIFGTTLDSKTQS  
 LLIVNNATNVVIKVCEFQFCNDPFLGVYYHKNNKSWMESEFRVYSSANNCTFEYVSQ  
 PFLMDLEGKQGNFKNLREFVFKNIDGYFKIYSKHTPINLVRDLPQGFSALEPLVDLPIG  
 INITRFQTLALHRSYLT PGDSSSGWTAGAAAYYVGYLQPRTFLLKYNENGTITDAVD  
 CALDPLSETKCTLKSFTVEKGIYQTSNFRVQPTESIVRFPNITNLCPFGEVFNATRFASV  
 YAWNRKRISNCVADYSVLYNSASFSTFKCYGVSPTKLNDLCFTNVYADSFVIRGDEV  
 RQIAPGQTGKIADYNYKLPDDFTGCVIAWNSNNLDSKVGGNYNYLYRFRKSNLKP  
 ERDISTEIQAGSTPCNGVEGFNCYFPLQSYGFQPTNGVGYQPYRVVLSFELLHAPA  
 TVCGPKKSTNLVKNKCVNFNFNGLTGTGVLTESNKKFLPFQFGRDIADTTDAVRDP  
 QTLEILDITPCSFGGVSVITPGTNTSNQVAVLYQDVNCTEVPVAIHADQLTPTWRVYS  
 TGSNVFQTRAGCLIGAEHVNNSYECDIPIGAGICASYQTQTNSPRRARSVASQSIIAYT  
 MSLGAENSVAYSNNIAIPTNFTISVTTEILPVSMTKTSVDCTMYICGDSTECSNLLQ  
 YGSECTQLNRALTGIAVEQDKNTQEVFAQVKQIYKTPPIKDFGGFNFSQILPDPSKPSK  
 RSFIEDLLFNKVTLADAGFIKQYGDCLGDIAARDLCAQKFNGLTVLPPLLTDEMIQ  
 YTSALLAGTITSGWTFGAGAALQIPFAMQMAYRFNGIGVTQNVLYENQKLIANQFNS  
 AIGKIQDSLSSTASALGKLQDVVNQNAQALNTLVKQLSSNFGAISSVLNDILSRLDKV  
 EAEVQIDRLITGRLQSLQTYVTQQLIRAAEIRASANLAATKMSECVLGQSKRVDFCGK  
 GYHLMSFPQSAPHGVVFLHVTVPAQEKNFTTAPAICHGKAHFPREGVVFVSNQTH  
 WFVTQRNFYEPQIITDNTFVSGNCDVVIGIVNNTVYDPLQPELDSFKEELDKYFKNH  
 TSPDVLDGDISGINASVVNIQKEIDRLNEVAKNLNESLIDLQELGKYEYIKWPWYIW  
 LGFIAGLIAIVMVTIMLCCMTSCCSCCLKGCCSCGSCCKFDEDDSEPVKGVKLHYT

**Figure S9. Spike protein sequence.** Amino acid sequence alignment of the full-length spike protein of SARS-CoV-2 used in PNP vaccine immunization studies.
